# Supplementary material for: Pearl farming micro-nanoplastics affect both oyster physiology and pearl quality
Source: Research Square preprint supplement (doi:10.21203/rs.3.rs-3127557/v1), 2023-07-06
Supplement: Supplementary file 1 [file 01e45bc4a3af39ea2ca1ddb5.xlsx]

## Sheet: Fig. 1
	b	c	d	e			f			g
Condition	Ingestion (10^7)	Oxygen consumption	Assimilation efficiency	Scope for growth		Condition	Glycogen stores		Condition	Shell deposit rate
Control	11.6231	0.894	52.0618	51.3		Control	11.4712		Control	3.84724
Control	11.9599	0.892	47.8514	47.8		Control	9.86731		Control	4.80833
Control	9.46276	0.451	52.2371	45.8		Control	11.4712		Control	3.37915
Control	10.9232	0.678	45.852	43.3		Control	5.15857		Control	7.25219
Control	9.06083	0.543	49.3545	39.5		Control	1.55397		Control	7.53501
Control	10.0515	1.148	53.1831	40.2		Control	3.87077		Control	4.19755
Control	12.496	0.709	23.669	21.2		Control	11.0257		Control	4.64499
Control	10.9578	1.043	28.5633	18.3		Control	11.4712		Control	3.55006
Control	9.22078	0.638	32.9268	23		Control	10.5513		Control	4.29524
Control	10.3519	0.559	13.1609	6.5		Control	11.0257		Control	2.78765
Control	9.49809	0.558	28.0179	20.2		Control	8.30377		Control	4.26881
Control	10.9316	0.683	16.1568	9		Control	11.9742		Control	4.0437
Control	9.91144	0.353	43.4909	40.5		Control	11.3565		Control	5.86712
Control	12.7272	1.326	26.903	17.5		Control	11.4712		Control	4.70764
Control	10.9973	0.854	44.5236	39.7		Control	7.58245		Control	7.18256
Control	8.72555	0.75	30.8955	17.9		Control	11.4714		Control	5.60185
Control	12.2057	0.988	39.3247	36.7		Control	6.13991		Control	6.3444
Control	8.25518	0.616	36.1096	22.8		Control	1.09602		Control	6.03606
Control	11.6557	0.871	38.8721	35.5		Control	7.02404		Control	5.90806
Control	9.30227	0.873	40.7392	27.7		Control	11.4712		Control	8.04778
Control	9.79719	0.346	29.2845	25.4		Control	6.54384		Control	5.45064
Control	11.8571	0.893	37.1354	33.9		Control	11.4712		Control	5.81565
Control	11.7196	0.858	41.037	38.7		Control	11.7234		Control	6.19813
Control	13.3858	1.106	39.233	39.8		Control	4.08829		Control	4.59979
Control	12.2741	0.788	32.9894	31.6		Control	4.65876		Control	5.66478
Control	11.6982	0.682	36.4567	35.4		Control	4.91655		Control	5.69375
Control	10.9077	0.997	39.3483	31.2		Control	11.3565		Control	2.71821
Control	11.1441	0.77	38.0644	33.9		Control	5.09983		Control	0.704981
Control	8.36952	0.843	41.8905	25.1		Control	10.8157		Control	4.74953
Control	11.1944	1.065	42.8872	35.7		Control	11.4712		Control	4.79601
Control	9.44394	0.612	39.792	31		Control	1.57065		Control	4.36229
MNP(0.025)	12.4164	1.704	48.5156	39.6		Control	6.87785		Control	4.41613
MNP(0.025)	11.3278	0.806	39.6085	36		Control	4.24602		Control	6.87538
MNP(0.025)	11.4324	0.952	54.2561	52.1		Control	1.47447		Control	6.05493
MNP(0.025)	10.8427	0.69	28.775	23.2		Control	11.7077		Control	3.32303
MNP(0.025)	10.7799	1.05	5.15556	-8.9		Control	7.34189		Control	8.3171
MNP(0.025)	10.2494	0.846	24.5878	14.7		MNP(0.025)	2.53372		Control	4.02168
MNP(0.025)	9.55645	0.889	12.1474	-0.3		MNP(0.025)	4.13975		Control	6.22042
MNP(0.025)	10.3915	0.776	36.7796	29.4		MNP(0.025)	3.78635		MNP(0.025)	3.5419
MNP(0.025)	7.49356	0.7	39.5097	21.4		MNP(0.025)	1.96372		MNP(0.025)	6.22937
MNP(0.025)	7.94481	0.678	29.4877	15.2		MNP(0.025)	5.46226		MNP(0.025)	2.88857
MNP(0.025)	10.8281	0.651	35.0305	30.9		MNP(0.025)	4.07073		MNP(0.025)	8.18195
MNP(0.025)	11.5913	0.563	40.3301	41.4		MNP(0.025)	4.38662		MNP(0.025)	7.77859
MNP(0.025)	10.908	0.825	15.6527	6.4		MNP(0.025)	2.88826		MNP(0.025)	7.03728
MNP(0.025)	10.2711	0.73	35.7216	28.4		MNP(0.025)	5.15706		MNP(0.025)	6.51136
MNP(0.025)	7.6396	0.959	17.9703	1		MNP(0.025)	4.97585		MNP(0.025)	7.30605
MNP(0.025)	9.73386	0.732	21.9377	-10.3		MNP(0.025)	7.38583		MNP(0.025)	8.22617
MNP(0.025)	8.83096	0.637	29.254	-9		MNP(0.025)	6.18985		MNP(0.025)	5.1999
MNP(0.025)	12.4436	1.022	33.5648	29.7		MNP(0.025)	8.81343		MNP(0.025)	3.8159
MNP(0.025)	13.7247	1.186	25.7307	20.6		MNP(0.025)	6.49547		MNP(0.025)	3.97404
MNP(0.025)	12.1316	0.968	29.7976	24.5		MNP(0.025)	0.307684		MNP(0.025)	5.99664
MNP(0.025)	10.6926	0.718	27.6323	21.1		MNP(0.025)	8.30836		MNP(0.025)	1.98514
MNP(0.025)	9.94807	0.466	35.0157	30.2		MNP(0.025)	5.33719		MNP(0.025)	6.44459
MNP(0.025)	10.3136	1.001	41.0821	30.6		MNP(0.025)	1.54289		MNP(0.025)	3.02085
MNP(0.025)	10.2162	0.613	30.2775	24		MNP(0.025)	1.02881		MNP(0.025)	6.64617
MNP(0.025)	13.382	0.969	35.4528	36.4		MNP(0.025)	7.16775		MNP(0.025)	3.52543
MNP(0.025)	12.0249	1.038	28.2826	21.3		MNP(0.025)	4.98804		MNP(0.025)	3.20988
MNP(0.025)	11.6087	0.919	19.4565	10.9		MNP(0.025)	5.61172		MNP(0.025)	3.66644
MNP(0.025)	6.82937	0.407	21.1421	9.5		MNP(0.025)	6.41703		MNP(0.025)	4.36095
MNP(0.025)	11.3667	0.919	35.1471	29.2		MNP(0.025)	10.6232		MNP(0.025)	3.49167
MNP(0.025)	11.5679	0.641	32.8388	31.1		MNP(0.025)	4.08144		MNP(0.025)	5.01794
MNP(0.025)	12.0655	0.9	35.649	32.7		MNP(0.025)	3.38445		MNP(0.025)	6.21838
MNP(0.025)	11.7206	0.748	34.2561	31.8		MNP(0.025)	6.63789		MNP(0.025)	7.9554
MNP(0.025)	10.7325	0.684	46.58	43.1		MNP(0.025)	4.79766		MNP(0.025)	4.38139
MNP(0.025)	5.78097	0.54	46.856	21		MNP(0.025)	1.81383		MNP(0.025)	1.15526
MNP(0.025)	10.0434	0.686	35.1648	27.6		MNP(0.025)	5.587		MNP(0.025)	8.84901
MNP(0.025)	9.87701	0.673	26.6269	18.3		MNP(0.025)	4.34232		MNP(0.025)	1.8724
MNP(0.025)	9.22561	0.733	25.8536	14.8		MNP(0.025)	0.186038		MNP(0.025)	6.36927
MNP(1)	16.3105	1.041	17.9305	16.2		MNP(0.025)	0.559075		MNP(0.025)	7.79396
MNP(1)	15.3278	1.345	29.2147	28.3		MNP(0.025)	2.65522		MNP(0.025)	3.33638
MNP(1)	10.5576	0.796	58.8366	54.3		MNP(0.025)	4.7151		MNP(0.025)	1.22326
MNP(1)	13.8386	0.991	23.3924	20.2		MNP(0.025)	0.968793		MNP(0.025)	3.02462
MNP(1)	11.982	0.604	0	-8.5		MNP(0.025)	6.96306		MNP(0.025)	6.50772
MNP(1)	11.212	0.759	46.8711	44.8		MNP(0.025)	9.33703		MNP(0.025)	3.72988
MNP(1)	12.3913	0.866	23.785	18.9		MNP(0.025)	4.05125		MNP(0.025)	7.68431
MNP(1)	8.08306	1.01	0	-14.2		MNP(1)	14.5652		MNP(0.025)	5.10217
MNP(1)	14.0372	0.779	41.448	50.4		MNP(1)	16.4522		MNP(0.025)	4.66776
MNP(1)	11.4088	0.788	35.7679	32		MNP(1)	9.41589		MNP(0.025)	6.12737
MNP(1)	10.3276	1.033	32.7973	21.2		MNP(1)	13.4906		MNP(0.025)	4.61954
MNP(1)	12.7531	1.038	31.8716	28.3		MNP(1)	15.3919		MNP(0.025)	5.18708
MNP(1)	11.2842	0.587	32.5244	30.5		MNP(1)	6.19273		MNP(1)	6.38333
MNP(1)	11.1765	0.743	0	-10.5		MNP(1)	15.9933		MNP(1)	9.93201
MNP(1)	12.7241	0.995	0	-14		MNP(1)	19.8274		MNP(1)	5.69008
MNP(1)	11.1964	1.165	34.1542	23.9		MNP(1)	4.38971		MNP(1)	7.41653
MNP(1)	11.3732	0.636	33.6157	31.4		MNP(1)	3.73374		MNP(1)	6.47241
MNP(1)	10.5689	0.828	30.6924	22.6		MNP(1)	5.71295		MNP(1)	4.49196
MNP(1)	15.3677	1.12	37.5353	45.1		MNP(1)	6.6495		MNP(1)	7.57179
MNP(1)	13.9046	0.553	35.2211	43.9		MNP(1)	7.87394		MNP(1)	5.80392
MNP(1)	15.4159	0.87	34.2086	43.4		MNP(1)	4.46242		MNP(1)	8.31238
MNP(1)	12.3504	0.645	38.4455	41		MNP(1)	5.55905		MNP(1)	5.3209
MNP(1)	13.4224	0.872	20.0411	16.1		MNP(1)	4.78013		MNP(1)	7.52722
MNP(1)	13.2179	0.695	34.4403	38.3		MNP(1)	5.11295		MNP(1)	2.23753
MNP(1)	9.33996	0.764	23.0812	12		MNP(1)	1.09218		MNP(1)	7.99588
MNP(1)	14.1696	0.903	34.722	39.2		MNP(1)	9.37255		MNP(1)	5.03489
MNP(1)	13.7606	0.983	33.3251	34.5		MNP(1)	5.35943		MNP(1)	6.83524
MNP(1)	12.6814	0.869	38.6883	39.5		MNP(1)	7.3765		MNP(1)	2.79499
MNP(1)	11.4473	0.783	44.5752	42.8		MNP(1)	8.72369		MNP(1)	6.96191
MNP(1)	13.1273	0.876	27.9646	26.4		MNP(1)	4.51882		MNP(1)	5.71479
MNP(1)	11.9696	0.615	8.49362	2.1		MNP(1)	16.8521		MNP(1)	7.52699
MNP(1)	12.0801	0.864	0	-12.2		MNP(1)	11.7193		MNP(1)	8.16951
MNP(1)	11.388	0.649	0	-9.1		MNP(1)	14.6953		MNP(1)	5.63898
MNP(1)	11.7224	0.8	0	-11.3		MNP(1)	0.463247		MNP(1)	6.58054
MNP(1)	10.9583	0.764	30.9215	25		MNP(1)	14.1306		MNP(1)	6.7091
						MNP(1)	11.9718		MNP(1)	3.9065
						MNP(1)	10.7055		MNP(1)	3.48936
						MNP(1)	8.48476		MNP(1)	5.32665
						MNP(1)	7.36718		MNP(1)	2.30921
						MNP(1)	0.525039		MNP(1)	4.68274
						MNP(1)	5.5947		MNP(1)	5.12844
						MNP(1)	6.33526		MNP(1)	8.39704
						MNP(1)	4.20722		MNP(1)	2.50795
						MNP(1)	9.53235		MNP(1)	7.62172
						MNP(1)	3.28771		MNP(1)	7.47421
						MNP(1)	3.27559		MNP(1)	4.46826
						MNP(1)	2.60991		MNP(1)	3.33612
						MNP(1)	2.89358		MNP(1)	2.54333
						MNP(1)	4.68303		MNP(1)	5.01313
						MNP(1)	4.08869		MNP(1)	5.06006
									MNP(1)	4.68274
									MNP(1)	5.23157
									MNP(1)	6.25978
									MNP(1)	3.5362
									MNP(1)	3.2641
									MNP(1)	6.15111
									MNP(1)	4.58412
									MNP(1)	6.38166

## Sheet: Fig. 2
Harvest				a
Condition	Pearl type	% tank1	% tank2	Mean	SD
Control	Pearl	53.3333	71.4286	62.381	12.7953
Control	Keshi	0	0	0	0
MNP(0.025)	Pearl	47.3684	72	59.6842	17.4172
MNP(0.025)	Keshi	15.7895	4	9.89474	8.33642
MNP(1)	Pearl	68	51.8519	59.9259	11.4185
MNP(1)	Keshi	24	11.1111	17.5556	9.11382
Pearl quality		e	f			g	i
Condition	Pearl type	Biomineralization (µm/d)	% periostracum	% calcite	% aragonite	Aragonite fronts space	Aragonite platelet thickness
Control	Pearl	3.05981	0	8.42813	91.5715	20.6064	503.731
Control	Pearl	2.76869	0	7.80246	92.0721	15.746	526.185
Control	Pearl	3.26068	0	35.0655	64.8397	12.7562	592.734
Control	Pearl	3.38034	0	24.1188	73.2521	12.9736	655.853
Control	Pearl	3.49145	0	55.1812	44.8383	In progress	464.343
Control	Pearl	2.63816	0	5.08642	94.6051	16.5671	612.069
Control	Pearl	2.33244	0	55.1105	43.3757	17.0474	561.491
Control	Pearl	3.28974	0	24.2401	71.916	11.5117	449.714
Control	Pearl	2.77923	0	24.7378	75.0709	21.5042	546.538
Control	Pearl	3.13462	0	6.2045	93.7955	In progress	422.227
Control	Pearl	2.38519	16.6895	78.7901	6.30384	18.1211	326.714
Control	Pearl	3.6453	0	3.58148	96.4576	16.2338	405.449
Control	Pearl	2.48718	0	7.98797	91.92	17.04	405.623
Control	Pearl	1.79342	0	3.90078	96.3481	20.74	400.403
Control	Pearl	5.34295	0	25.063	71.4299	10.4503	430.315
Control	Pearl	5.11324	3.19683	96.8032	0	Calcitic	NA
Control	Pearl	0.829167	0	23.1156	76.9103	In progress	567.107
MNP(0.025)	Pearl	5.42949	0	6.36364	93.6393	10.9304	483.532
MNP(0.025)	Pearl	6.74788	0	3.23938	96.8069	11.1147	535.945
MNP(0.025)	Pearl	4.37235	0.293218	21.4303	79.9375	15.1	392.376
MNP(0.025)	Pearl	6.6891	0	5.15573	94.8427	16.0939	536.188
MNP(0.025)	Pearl	1.33397	8.64969	91.3503	0	Calcitic	NA
MNP(0.025)	Pearl	2.18808	0	54.6669	45.3331	19.8294	381.525
MNP(0.025)	Pearl	2.21226	3.28395	94.5873	9.53965	In progress	317.716
MNP(0.025)	Pearl	1.44744	0	86.2622	19.5039	In progress	369.596
MNP(0.025)	Pearl	2.05987	80.2888	14.5827	0	In progress	415.844
MNP(0.025)	Pearl	4.91455	7.04345	57.6519	35.1201	18.9712	367.576
MNP(0.025)	Pearl	6.03061	9.88812	90.1119	0	Calcitic	NA
MNP(0.025)	Pearl	2.61752	22.2857	77.7143	0	Calcitic	NA
MNP(0.025)	Pearl	3.68577	21.3689	77.9737	0	Calcitic	NA
MNP(0.025)	Pearl	5.44689	5.37533	88.2655	3.99981	14.1333	286.487
MNP(0.025)	Pearl	1.18094	0	76.4059	25.1276	In progress	334.979
MNP(0.025)	Pearl	3.05987	0.698314	55.0998	45.2256	16.4918	437.667
MNP(0.025)	Pearl	3.55556	0	17.9327	82.1539	17.1557	475.053
MNP(0.025)	Pearl	2.30056	7.06816	92.9318	0	Calcitic	NA
MNP(0.025)	Pearl	3.92413	5.72966	62.5526	31.0872	14.5655	451.938
MNP(0.025)	Pearl	3.13138	0	8.69507	91.3374	In progress	584.598
MNP(0.025)	Pearl	2.2692	0	13.3844	87.2614	17.5279	505.723
MNP(0.025)	Pearl	4.85737	0	6.68888	93.2677	13.3621	546.306
MNP(0.025)	Pearl	1.23744	0	23.3389	76.3052	In progress	489.843
MNP(0.025)	Pearl	2.47522	0	23.1616	76.1969	In progress	490.617
MNP(0.025)	Pearl	2.56483	10.2004	29.2117	56.9345	21	444.607
MNP(1)	Pearl	2.87016	3.25297	13.7076	83.9508	10.2638	365.95
MNP(1)	Pearl	3.23997	13.6061	81.5209	5.89964	16.1584	289.394
MNP(1)	Pearl	0.788077	0	32.482	54.577	In progress	321.16
MNP(1)	Pearl	4.80663	0	0.416092	99.5744	11.7203	414.411
MNP(1)	Pearl	2.89744	0	46.1018	55.1798	16.2328	418.2
MNP(1)	Pearl	4.56564	2.88526	14.1532	81.5873	12.5468	380.631
MNP(1)	Pearl	3.54808	3.59079	96.4092	0	In progress	410.727
MNP(1)	Pearl	4.05929	6.84564	78.2471	17.0512	11.6042	307.911
MNP(1)	Pearl	2.52083	0	34.3853	65.7466	20.7032	396.73
MNP(1)	Pearl	1.66526	2.64839	100	0	Calcitic	NA
MNP(1)	Pearl	4.03419	5.14831	38.6494	56.0542	11.2911	409.588
MNP(1)	Pearl	3.11003	14.0849	40.6594	53.919	16.2567	387.624
MNP(1)	Pearl	3.14849	0	51.3066	47.9287	10.2487	415.303
MNP(1)	Pearl	6.58337	0	8.36413	91.6411	10.6077	434.333
MNP(1)	Pearl	4.83865	0	13.1374	86.7481	In progress	429.169
MNP(1)	Pearl	0.620299	0	13.1175	85.8905	In progress	419.25
MNP(1)	Pearl	2.89317	6.14621	68.2675	24.7953	In progress	441.322
MNP(1)	Pearl	0.849167	0	100	0	Calcitic	NA
MNP(1)	Pearl	0.855513	0	40.2555	65.3498	30.5265	437.67
MNP(1)	Pearl	2.12606	0	4.39449	95.817	25.8594	447.607
MNP(1)	Pearl	1.14619	0	18.9816	80.7809	29.405	390.68
MNP(1)	Pearl	1.2867	0	10.7336	92.3073	35.6618	411.773
MNP(1)	Pearl	3.36657	8.49891	42.5279	45.2544	In progress	315.337
MNP(1)	Pearl	1.73929	0	5.33299	94.9049	25.4857	413.241
MNP(1)	Pearl	4.73609	0.74442	10.0537	67.6072	14.1321	428.477

## Sheet: Supplementary Fig. 9
Laser diffraction analysis	a	b	c	d
MNP size (µm)	% volume	% number	% volume	% number
0.375198	0.00890045	6.05101	0.0322134	8.66125
0.496347	0.0379384	11.1409	0.120373	13.9797
0.656615	0.0613333	7.77967	0.14081	7.06358
0.868632	0.0768506	4.21053	0.102894	2.22949
1.14911	0.0958557	2.26845	0.107035	1.00177
1.52015	0.135169	1.3817	0.242085	0.978668
2.011	0.201325	0.88891	0.446335	0.779382
2.66033	0.277229	0.528721	0.511954	0.386142
3.51934	0.321346	0.26472	0.369349	0.120331
4.65572	0.28926	0.102926	0.258933	0.0364378
6.15902	0.185822	0.0285601	0.309633	0.0188207
8.14773	0.107424	0.00713161	0.142754	0.00374802
10.7786	0.175085	0.00502067	0	0
14.2589	0.326946	0.00404962	0.291077	0.00142585
18.863	0.478328	0.00255912	1.77892	0.00377175
24.9538	1.24356	0.00287376	1.78259	0.00162581
33.0113	2.86722	0.00286201	4.18647	0.00239071
43.6704	4.71319	0.00203213	6.05605	0.000713858
57.7713	7.21684	0.00134402	8.54476	0.000629344
76.4253	7.46101	0.000600181	2.51641	3.43985e-05
101.103	4.97608	0.000172899	1.08125	2.07303e-06
133.748	1.78401	2.6775e-05	0.15086	1.49363e-05
176.935	0.243575	1.57903e-06	0	0
234.066	0	0	0	0
